# Supplementary material for: Management of calcified canals during root canal treatment. A systematic review of case reports
Source: PeerJ journal article supplement (doi:10.7717/peerj.19900), 2025-09-01
Supplement: PROSPERO.pdf [file PROSPERO.pdf]

## Management of calcified canals during root canal treatment. A Systematic Review of Case reports

KUNAL GIRI, KULVINDERSINGH BANGA, AJINKYA PAWAR

To enable PROSPERO to focus on COVID-19 submissions, this registration record has undergone basic automated checks for eligibility and is published exactly as submitted. PROSPERO has never provided peer review, and usual checking by the PROSPERO team does not endorse content. Therefore, automatically published records should be treated as any other PROSPERO registration. Further detail is provided [here](#).

### Citation

KUNAL GIRI, KULVINDERSINGH BANGA, AJINKYA PAWAR. Management of calcified canals during root canal treatment. A Systematic Review of Case reports. PROSPERO 2024 Available from <https://www.crd.york.ac.uk/PROSPERO/view/CRD42023460967>

## REVIEW TITLE AND BASIC DETAILS

### Review title

Management of calcified canals during root canal treatment. A Systematic Review of Case reports

### Original language title

Management of calcified canals during root canal treatment. A Systematic Review of Case reports

### Review objectives

What are the different ways of management of calcified canals during root canal treatment?

## SEARCHING AND SCREENING

### Searches

A systematic search following the principle of systematic review search will be carried out in the Cochrane Central Register of Controlled Trials (CENTRAL), MEDLINE, Google Scholar, PubMed using MeSH words, text words and Boolean operators. The articles in the English language will be considered. The period of publication considered will be up to 30-09-2023.

## Study design

Inclusion:

In-vivo studies- case reports

Exclusion:

Clinical studies, cross-sectional studies, in-vitro and animal studies will be excluded

## ELIGIBILITY CRITERIA

---

### Condition or domain being studied

Pulp canal calcification, or sclerosis, may be the result of physiological aging of the tooth, sequela following dental trauma, surgeries (auto-transplantations), carious lesions, excessive orthodontics, iatrogenic dental treatment. The American Association of Endodontics (AAE) classifies these endodontic treatments as having a high level of difficulty, given the risk of complications or even failures. As conducting root canal treatment with calcified canals is difficult, different approaches for its management have been given in literature. The present systematic review aims to assess the different methods in management of calcified canals.

### Population

Studies involving the adult population undergoing root canal treatment.

### Intervention(s) or exposure(s)

Exposure: calcified root canals

### Comparator(s) or control(s)

Not applicable

### Context

Inclusion Criteria

- ☐ Studies published till 30/09/2023
- ☐ Studies published in English language only.
- ☐ Studies with full-text articles only will be included.
- ☐ Studies including population with calcified root canals will only be included

Exclusion Criteria

- ☐ Studies not fully available in the database.
- ☐ Cross-sectional studies, clinical trials, In-vitro and animal studies
- ☐ Studies presenting as only abstracts and not free full text articles

## OUTCOMES TO BE ANALYSED

---

### Main outcomes

Management of calcified root canals

*Measures of effect*

none

### Additional outcomes

Not required

*Measures of effect*

none

## DATA COLLECTION PROCESS

---

### Data extraction (selection and coding)

Titles and/or abstracts of studies retrieved using the search strategy and those from additional sources will be screened independently by two review authors to identify studies that potentially meet the inclusion criteria outlined above. The full texts of these potentially eligible studies will be retrieved and independently assessed for eligibility by two review team members. For the assessment of each publication, spreadsheets will be used. Data will be extracted using a standardized form. Both the authors will compare each other and confirm the data.

Two review authors will extract data independently and third author will cross check the data. Discrepancies will be identified and resolved through discussion (with a third author where necessary). The data to be extracted will include: author's name, year of publication, study design, sample size, age group, Intervention description, comparison description if any, outcome measures and confounding factors if any.

### Risk of bias (quality) assessment

Quality assessment of case reports will be done according to Joanna Briggs Institute (JBI) critical appraisal tool for case reports.

## PLANNED DATA SYNTHESIS

---

### Strategy for data synthesis

If similar kind of sufficient studies will be identified than Meta-analysis will be carried out. The RevMan software will be used for the analysis.

### Analysis of subgroups or subsets

Analysis of sub-groups is not planned yet.

## REVIEW AFFILIATION, FUNDING AND PEER REVIEW

---

### Review team members

- Dr KUNAL GIRI, NAIR HOSPITAL DENTAL COLLEGE
- Dr KULVINDERSINGH BANGA, NAIR HOSPITAL DENTAL COLLEGE
- Dr AJINKYA PAWAR, NAIR HOSPITAL DENTAL COLLEGE

### Review affiliation

NAIR HOSPITAL DENTAL COLLEGE

### Funding source

NO

### Named contact

KUNAL GIRI. DEPARTMENT OF CONSERVATIVE DENTISTRY AND ENDODONTICS, NAIR HOSPITAL DENTAL COLLEGE, DR A.L. NAIR ROAD, MUMBAI CENTRAL, MUMBAI 400008

kunalgiri4@gmail.com

## TIMELINE OF THE REVIEW

---

### Review timeline

Start date: 01 November 2023. End date: 30 April 2024

### Date of first submission to PROSPERO

08 September 2023

### Date of registration in PROSPERO

19 September 2023

## CURRENT REVIEW STAGE

---

### Publication of review results

The intention is not to publish the review once completed.

### Stage of the review at this submission

| Review stage                                        | Started | Completed |
|-----------------------------------------------------|---------|-----------|
| Pilot work                                          |         |           |
| Formal searching/study identification               |         |           |
| Screening search results against inclusion criteria |         |           |
| Data extraction or receipt of IP                    |         |           |
| Risk of bias/quality assessment                     |         |           |
| Data synthesis                                      |         |           |

### Review status

The review is currently planned or ongoing.

## ADDITIONAL INFORMATION

---

### PROSPERO version history

- Version 1.1 published on 19 Sep 2023
- Version 1.0 published on 19 Sep 2023

### Review conflict of interest

None known

### Country

India

### Medical Subject Headings

Environment; Humans; Root Canal Therapy; Tooth Root

### Disclaimer

The content of this record displays the information provided by the review team. PROSPERO does not peer review registration records or endorse their content.

PROSPERO accepts and posts the information provided in good faith; responsibility for record content rests with the review team. The owner of this record has affirmed that the information provided is truthful and that they understand that deliberate provision of inaccurate information may be construed as scientific misconduct.

PROSPERO does not accept any liability for the content provided in this record or for its use. Readers use the information provided in this record at their own risk.

Any enquiries about the record should be referred to the named review contact
