# Supplementary material for: Management of calcified canals during root canal treatment. A systematic review of case reports
Source: PeerJ. 2025 Sep 1;13:e19900. doi: 10.7717/peerj.19900 (PMC12422281; doi:10.7717/peerj.19900)
Supplement: Supplemental Information 2 [file peerj-13-19900-s002.xlsx]

## Sheet: Data extraction
	Study ID	Place of study	Age/Gender	Chief complaint	History	Teeth affected	Clinical examination	Radiographic examination	CBCT findings	Treatment planned	Follow-up	Outcome	Author conclusions
1	Gopikrishna 2004	India	21/M	swelling and discharge with upper anteriors	trauma 9 years back	11,21	diffuse swelling, sinus discharge, positive pain on percussion. Negative response to EPT	completely obliterated pulp chamber and pulp canal	-	Nonsurgical endodontic treatment	1 year	periapical healing	In cases with such calcified chambers and canals, use of chelating agents EDTA and NaOCl is highly useful
2	Koli 2014	India	24/M	persistent pus discharge from upper front teeth region since 6 months	blunt trauma	21,11,12	No tenderness on percussion, negative vitality tests	radiolucent lesion surrounded by radiopacity because of increased trabecular pattern, at apical third of 12 and 11	-	Nonsurgical endodontic treatment	not mentioned	periapical healing	Ultrasonics offers many applications and advantages in clinical endodontics. Improved visualization combined with a more conservative approach can be used to selectively remove the tooth structure
3	Krastl 2015	Germany	15/M	pain of his upper right central incisor	trauma 7 years ago	11	tooth discoloration, positive response on tender to percussion and a negative response was elucidated with both cold and electric pulp testing	completely obliterated pulp chamber and pulp canal	The CBCT showed clear signs of apical periodontitis.	guided endodontic surgery using 3D template	15 months	periapical healing	The presented guided endodontics approach seems to be a safe, clinically feasible method for locating root canals and preventing root perforation in teeth with Pulp Canal Calcification that cannot be predictably accessed via traditional endodontic therapy
4	Majid 2015	Libya	17/F	severe; throbbing; spontaneous pain in the upper right posterior area for 3 days	not mentioned	14	No tenderness on percussion, negative vitality tests	slight widening of the periodontal ligament space without periapicalchanges. There was a deep radiopaque restoration surrounded by a radiolucent area which may indicate secondary caries.The apical third of the root canal system appeared obliterated with a distal curvature .	-	Nonsurgical endodontic treatment	3 weeks	functional tooth	The prognosis of root canal treatment in these cases depends on continued health of the pulp or periapical area on the apical side of the blockage. In the absence of symptoms or evidence of apical pathogenesis.
5	Raghuvanshi 2015	India	26/M	intermittent pain in upper front region of jaw since 1 month.	trauma 5 years ago	21	discoloration and intro-oral sinus, non tender to vertical and horizontal percussion. Thermal and electric pulp response was negative	Pulp canal obliteration with 21#	-	Nonsurgical endodontic treatment	not mentioned	functional tooth	The cases presented are the example of radiographically unidentifiable pulp chamber that is difficult to treat but manageable via nonsurgical root canal therapy
			21/M	discoloration in upper front region of jaw since 6 months	trauma 2 years back	11	discoloration and intro-oral sinus, non tender to vertical and horizontal percussion. Thermal and electric pulp response was negative	pulp canal obliteration with 11	-	Nonsurgical endodontic treatment	not mentioned	functional tooth
6	Shi 2017	China	29/F	pulp canal calcification during endodontic treatment of the mandibular right first molar.	not mentioned	46	The tooth was tender to percussion and non-responsive to thermal and electrical pulp testing	-	-	guided endodontic surgery	6 months	periapical healing	Guided endodontics appears to be a safe and clinically useful method for treating teeth with pulp canal calcifica tion and apical pathology. The use of 3D printed tem plates may facilitate the localisation of the canal and allow for a more predicable approach.
7	Almohaimede 2018	Saudi Arabia	17/F	mild‑to‑moderate pain related to lower right posterior teeth during biting.	not mentioned	46	Percussion test revealed mild‑to‑moderate tenderness and no pain with palpation test	IOPA - periapical radiolucency, narrow mesial canals, and a restorative material encroaching the pulp chamber that was partially calcified	mesiolingual (ML) canal was completely calcified	Nonsurgical endodontic treatment	not mentioned	functional tooth	Several aiding tools should be used to negotiate calcified pulp chambers and canals to improve the treatment outcome. The use of CBCT cannot substitute the use of the conventional radiography. However, the advantages and the indications to use this technology should be considered.
8	Lara-Mendes 2018	Brazil	26	symptoms in the region of the maxillary cen tral incisors	trauma	11,21	the tooth failed to respond to the ther mal and electrical tests, but the patient reported pain to percussion, which suggests a diagnosis of initial acute apical periodontitis	-	An apical radiolucent area was observed in the left maxillary central incisor, coinciding with the pain described by the patient. The canal space was only visible in the apical 2 mm of the root	guided endodontic surgery	1 year	periapical healing	This study describes a case report about a severely calcified maxil lary central incisor in which the planning and execution of a minimally invasive access was altered to mitigate the damage to the dental incisal edge.
9	Tavares 2018	Brazil	43/F	history of pain in the maxillary right central incisor	trauma 25 years back	11	The tooth was discolored and yellow, and it presented tenderness to percussion. Thermal and electrical sensitivity tests were negative	severely calcified root canal	-	guided endodontic surgery	15 days	asymptomatic tooth	The conventional opening access programming of guided end odontics in cases of PCC in anterior teeth with apical periodontitis has been shown to be very reliable and permits proper root canal disin fection expeditiously
			24/F	endodontic treat ment of the maxillary right central incisor	trauma	11	sensitive to percussion and palpation tests.	-	confirmed the pres ence of severe canal calcification and apical periodontitis.	guided endodontic surgery	30 days	asymptomatic tooth
10	Torres 2018	Belgium	85/F	root canal treatment	not mentioned	22	no percussion pain or sinus tract	-	calcified root canal up to the apical third of the root and an apical radiolucency	guided endodontic surgery	6 months	periapical healing	Using the Microguided Endodontics concept, a minimally invasive access was achieved up to the middle of the root, in a maxillary lateral incisor with PCO and apical periodonti tis. This technique may be a valuable tool for the negotiation of pulp canal obliteration, reducing chair time and risk of iatrogenic damage to the root
11	Hegde 2019	India	24/M	discoloration of teeth	trauma	11	negative electric pulp test	complete calcification of the root canal and periapical radiolucency with 11	showed that the canal was obliterated in the cervical and middle third and was patent in the apical 7 mm	guided endodontic surgery	not mentioned	functional tooth	In this case report, guided endodontic therapy was found to be a time-saving method of the management of PCO in anterior teeth
12	Maia 2019	Brazil	47/F	presence of acute symp tomatology	not mentioned	26	presence of percussion sensitivity and a negative response to thermal and electrical tests	obliterated pulp chamber and possible calcification of the buccal ca nals	-	3D printed endodontic guide	15 days. 6,12 months	periapical healing	The clinical case reports presented here unequivocally show that such technological evolution should make guided endodontic procedures more accessible and widespread, even among less experi enced operators.
			65/F	history of pain in the second left upper premolar	parafunctional habits	25	fracture of the palatal cusp, great coronal wear, and percussion sensitivity	-	confirmed pulp obliteration
			45/F	endodontic treatment	not mentioned	15	api cal periodontitis and positive sensitivity to percussion and palpation tests.	-	2 severely calcified root canals that converged in a single foramen in the apical third
13	Tchorz 2019	Germany	42/F	minor symptoms of tenderness to percussion in mandibular left central incisor	not mentioned	31	No tenderness on percussion, negative vitality tests	PCC up to the apical third of the root and periapical periodontitis	-	guided endodontic surgery	not mentioned	periapical healing	The utilization of access guide for localization of remaining pulp spaces is a reliable method in cases of PCC
14	Dornala 2020	India	51/M	pain in the maxillary central incisor from 1 month	trauma 3 years back	11	intact crown with tenderness to percussion in relation to the maxillary right central incisor. No mobility was recorded	radio-opacity involving the coronal aspect of the tooth and obliteration of the pulp canal associated with radiolucency involving the periapical region of 11	partial calcification involving the coronal part of the tooth approximating to the cervical third of the root	3D printed endodontic guide	3 months	signs of healing	guided endo dontic technique is proven to prepare minimal access cavity with predictable treatment outcome in teeth with Calcific Metamorphosis
15	Freire 2020	Brazil	23/F	coronary browning of upper left central incisor	trauma	21	tooth tender to percussion, negative response to pulp sensitivity tests	IOPA showed calcified pulp and pulp canal	reduced pulp canal lumen in all extensions	guided endodontic surgery	2 years	peri apical healing	The guided endodontic method extrapolates the planning phase and directly assists dental surgeon during treatment of calcified teeth
16	Ishak 2020	Lebanon	52/F	dull pain when chewing	bruxism	31,41	Sensibility testing showed these teeth were tender to percussion	severe calcification of the pulp chamber and root canal, with no apparent radiolucent lesions	revealed visible canal space beyond the coronal and middle third junction, starting at 9 mm for tooth 31 and 4 mm for tooth 41	Guided endodontic treatment	not mentioned	healing	The endodontic guide should be considered during treatment planning for calcified canals, in order to raise the success rate and minimize clinical stress for both the patient and the practitioner
17	Mussab 2020	Pakistan	42/M	pain on biting in one of his upper left teeth for the past two weeks	caries	24	tooth tender to percussion, negative response to pulp sensitivity tests	The outline of root canals was not visible on the periapical radiograph giving an impression of calcification along with a presence of periapical radiolucency.	The canal image was dim as compared to the canals in other teeth. Buccal canal was not visible in the axial view at any level of the root.	Nonsurgical endodontic treatment	not mentioned	periapical healing	It is possible to treat the teeth with calcified canals if proper equipment and instruments are used along with 3D diagnostic modalities like CBCT. 2D radiographs at different angulations can also play an important role but CBCT is of prime importance in such challenging endodontic cases as it reveals better anatomic detail.
18	Tavares 2020	Brazil	35/F	pain	not mentioned		pain on palpation and tenderness to percussion associated with the affected tooth	complete absence of the root canal space and apical radiolucency	confirmed severe PCO	guided endodontic treatment + antimicrobial photodynamic therapy (aPDT).	12 months	periapical healing	The use of guided endodontics combined with aPDT for the treatment of severe PCO and apical periodontitis ensured clinical, radiographic, and tomographic success at the 1-year follow-up.
19	Goncalves 2021	Brazil	40/F	pain in upper left canine region	orthodontic treatment	23	slight discoloration of crown, negative pulp test, absence of pain	-	severe calcification of root canal upto apical third	guided endodontic treatment	60 days	periapical healing	The use of guided endodontics allowed the preservation of large part of dental structure.
20	Meyappan 2021	India	35/F	darkening of the tooth in the upper front region of the jaw for the past 6 months	trauma	21	no tenderness on percussion, Thermal and electric pulp testing showed a negative response	The outline of the root canal was not clear on the periapical radiograph which suggested the calcification of the root canal.	The canal was not visible till the middle third of the root canal	Nonsurgical endodontic treatment	not mentioned	healing	With the application of CBCT as a guide, it is helpful in orienting the burs angulation within the pulp chamber with fewer chances of iatrogenic injury
			42/M	discoloration of a tooth in the upper front tooth region of the jaw for the past 2 months	trauma	21	no tenderness on percussion, Thermal and electric pulp testing showed a negative response	The outline of the root canal was not clear on the periapical radiograph which suggested the calcification of the root canal.	The canal was not visible till the middle third of the root canal	Nonsurgical endodontic treatment	not mentioned	healing
21	Quaresma 2021	Portugal	58/F	sporadic discomfort imprecisely localized in the right maxillary region, which worsened when chewing, and had been present for several months	not mentioned	16	grade 1 tooth mobility, positive complaints in response to percussion and palpation tests, and no response to the cold pulp test	alterations at the level of the periapical bone trabeculae and apparent reduction in volume of the pulp chamber	severe calcification of the first mesiobuccal (MB1) canal was evident	Nonsurgical endodontic treatment	not mentioned	periapical healing	It could be noted that the use of CBCT in two moments of root canal treatment allowed three-dimensional localization of the anatomical variations, and location of the canal orifice.
			32/F	endodontic evaluation	orthodontic treatment	41	grade 1 tooth mobility and periodontal probing scores within healthy limits; negative percussion tests, with no associated pain; increased pain response to cold sensitivity testing	severe root canal calcification, presence of internal resorption	severe calcification of the root canal and the presence of internal resorption, with irregular peripheral expansion in the region of the coronal third of the root, without root perforation	Nonsurgical endodontic treatment	not mentioned	periapical healing
22	Takeichi 2021	Japan	70/F	slight occlusal pain in tooth	not mentioned	26	Percussion test revealed mild‑to‑moderate tenderness and no pain with palpation test	alterations at the level of the periapical bone trabeculae and apparent reduction in volume of the pulp chamber	root canals couldnot be well recognized except for the middle third of the canal	Nonsurgical endodontic treatment	not mentioned	healing	CBCT image interpretation and use of surgical microscope and NiTi instruments are necessary for the treatment of pulp canal with obliterations
23	Chaudhary 2022	India	28/F	pain in the upper front region of the jaw for 1 month.	trauma 2 years back	21	slight discoloration of the crown as well as tenderness to palpation and percussion, no response to cold test and electric pulp test.	IOPA - obliteration of the pulp canal along with widening of the periodontal ligament space	-	Nonsurgical endodontic treatment	1 week	functional tooth	This case report described that even though the management of calcified canal is difficult; how proper use of knowledge about tooth morphology and canal negotiation techniques; appropriate use of instruments, materials and diagnostic aids along with lots of patience, effort and care helped to overcome the challenges offered during its management.
24	Emek 2022	Turkey	22/F	Pain in maxillary left second premolar teeth	orthodontic treatment	25	negative responses to thermal and electrical tests and the presence of severe percussion sensitivity dur ing bite pressure	obliterated pulp chamber and calcified root canal.	-	3D printed endodontic guide	7 days, 1 month, 3 months	No symptoms, functional tooth	In the treatment of teeth with obliterated root canals, many complications can be prevented by providing a safe endodontic intervention with the aid of GE obtained with 3D printers.
25	Heptania 2022	Indonesia	20/F	complaining of a cavity in the lower-left molar 7 months ago	caries	36	The tooth gave a positive response to the electric pulp test and was not tender to percussion and palpation	mesial root canals with overlapping positions on x-rays appeared as two calcified mesial roots	-	Nonsurgical endodontic treatment	not mentioned	functional tooth	The case presented is one of the most challenging cases encountered by endodontists. Success is achieved with clinical knowledge, magnification aids and ultrasonic tips
26	Nabavi 2022	Iran	58/M	root canal treatment of teeth #24, #25 and #26 due to prosthodontic reasons	prosthodontic reason	24,25,26	patient was asymptomatic with no pain on percussion or sinus tract	partial canal obliteration of anterior teeth	calcified root canal in the coronal third of the root	3D printed endodontic guide	6 months	functional tooth	The guided endodontic technique was proven to be highly efficient in management of mandibular incisors with pulp canal obliteration.
27	Nazar 2022	India	48/F	swelling on the upper left front tooth region for 8 months	orthodontic treatment	22	well‑defined swelling with a diameter of 1 cm in relation to upper left lateral incisor, tender on percussion and a negative response to EPT	round well‑defined periapical radiolucency and completely obliterated pulp chamber and pulp canal in the coronal part	periapical lesion having a diameter of 8.3 mm breaching the labial cortical plate	3D printed endodontic guide	1,2,3 months	periapical healing	This case report confirms that even large periapical lesions can respond favorably to nonsurgical treatment and therefore, it must always be the first treatment of choice.
28	Santiago 2022	Brazil	58/F	endodontic treatment of the frst right mandibular molar	caries	44	the patient was asymptomatic, with a negative response to thermal and percussion tests	obliteration of the root canals in the mesial and distal roots	confrmed the obliterations inside the mesiobuccal canal (MB) and the mesiolingual canal (ML)	guided endodontics	not mentioned	functional tooth	The guided endodontic represents a personalized technique that provides security, reduced risks of root perforation, and a signifcant decrease of the working time
29	Sekiguchi 2022	Japan	40/F	severe swelling and pain 10 days ago	orthodontic treatment	43,13	negative responses to thermal and electrical tests and the presence of severe percussion sensitivity dur ing bite pressure	obliterated pulp chamber and calcified root canal.	no pulp cavity was apparent	Microendosurgery	not mentioned	periapical healing	Treatment was undertaken using microendosurgery since access from the crown side was not possible. As a result the patient has progressed with good prognosis
30	Sinha 2022	India	64/M	history of pain involving tooth 14 since last one month	caries	14	mesial proximal caries was detected and the tooth was extremely tender to percussion.	presence of two roots with complete obliteration of the pulp chamber as well as the root canals	-	Nonsurgical endodontic treatment	not mentioned	periapical healing	Teeth with PCO requiring root canal treatment are very challenging and time-consuming but the use of new technologies, good knowledge of pulp anatomy and radiographic techniques and patience, are the keys to success in solving cases of PCO
			18/F	pain in the lower right back tooth since last one month	orthodontic treatment	46	periodontal pockets were detected both on the mesial and distal of tooth 46 and the tooth was also tender to percussion	presence of complete obliteration of the pulp chamber however the root canals were patent	-	Nonsurgical endodontic treatment	not mentioned	periapical healing
31	Lewis 2023	India	19/F	pain on bite pressure in the anterior region of the maxilla	trauma	21,22	tooth #21 was grossly destructed and submerged within the gingiva and alveolar socket. Tooth #22 presented with a restoration	-	Obliteration of the pulp chamber and the parameters of the periapical radiolucency were seen	Nonsurgical endodontic treatment	1,3,6,12 months	patient is asymptomatic	Guided endodontics employs a minimally invasive endodontic approach to successively treat teeth with pulp and periapical disease.
32	Palipana 2023	Sri Lanka	26/F	tenderness around the apex of tooth	orthodontic treatment	21	positive on tenderness to percussion	-	-	Nonsurgical endodontic treatment	1 month	patient is asymptomatic	CBCT determines and assists in the least invasive and easy negotiation of teeth with PCC with a predictable treatment outcome
33	Panithini 2023	India	35/F	discoloration in the upper maxillary central incisor	trauma	21	tooth tender to percussion, negative response to pulp sensitivity tests	obliterated pulp chamber, a calcified root canal with periapical radiolucency	-	Nonsurgical endodontic treatment	not mentioned	healing	Dynamic navigation, in this case, enabled the precise development of a less invasive access path using the real-time feedback from the drilling device.
34	Zargar 2023	Iran	32/F	discoloration in the left maxillary central incisor	trauma 10 years back	21	discoloration, no response to to the pulp sensibility tests, there was no symptom in percussion and palpation	pulp canal calcification and rarefaction in the periapical area	obliteration in the coronal and middle thirds (15 mm) of the canal	Guided endodontic treatment	18 months	healing	This case report explains RCT with an endodontic guide for a heavily calcified central incisor of the maxilla in which the access was modified to preserve the incisal edge. The long-term prognosis can be enhanced by this conservative technique.

## Sheet: excluded studies
	Kaur 2021	free full text article not available
	Khatod 2022	free full text article not available
	Nasiri 2023	Letter to editor
	Villa-Machado 2022	free full text article not available
	Kostunav 2021	free full text article not available
	Yang 2016	not case report
